# Supplementary material
Source: Springer Nature journal article supplement (https://www.springermedizin.de/resource/supplementary/13024_2013_576_MOESM1_ESM.pdf/9644336)

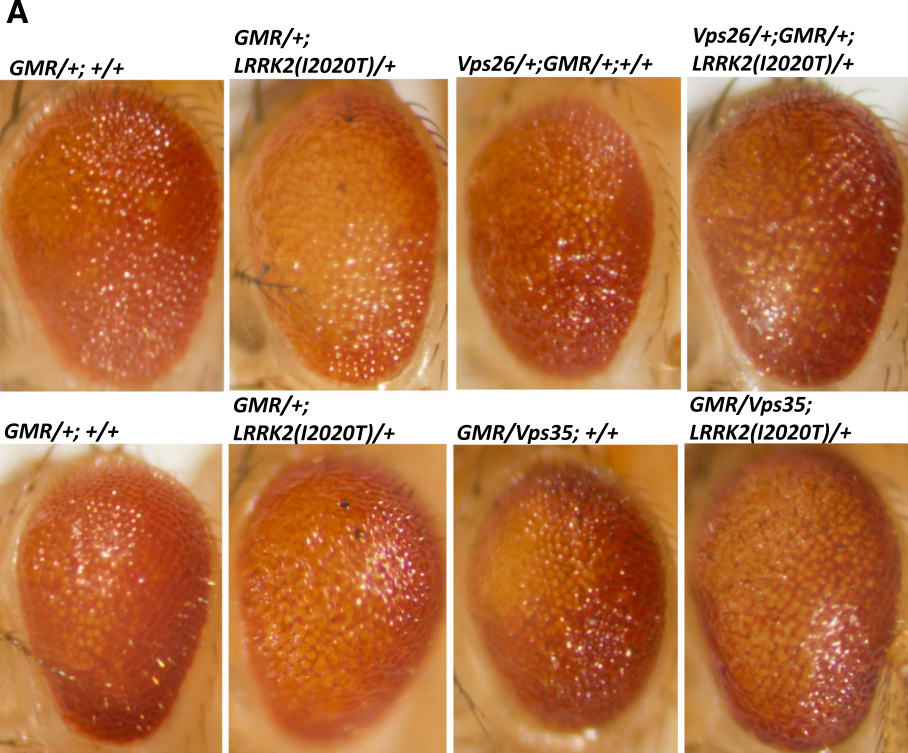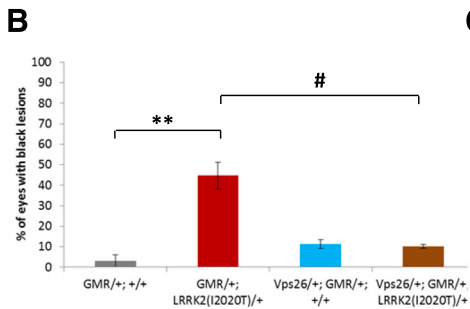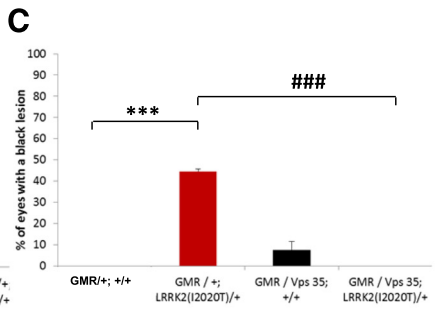

Supplement: MOESM1 [file 9644336]
